# Supplementary material for: Synthesis of aminopropyltriethoxysilane grafted/tripolyphosphate intercalated ZnAl LDHs and their performance in the flame retardancy and smoke suppression of polyurethane elastomer
Source: Royal Society of Chemistry journal article supplement (doi:10.1039/c6ra06713a), 2016-01-01
Supplement: c6ra06713a1.pdf [file c6ra06713a1.pdf]

## Electronic Supplementary Information

Synthesis of aminopropyltriethoxysilane grafted/tripolyphosphate intercalated ZnAl LDHs and its performance in the flame retardancy and smoke suppression of polyurethane elastomer

**Wenzong Xu,<sup>\*ab</sup> Shaoqing Wang,<sup>a</sup> Aijiao Li<sup>a</sup> and Xiaoling Wang<sup>a</sup>**

<sup>a</sup>School of Materials Science and Chemical Engineering, Anhui Jianzhu University, 292 Ziyun Road, Hefei 230601, Anhui Province, P.R. China

<sup>b</sup>State Key Lab of Fire Science, University of Science and Technology of China, Hefei 230026, Anhui Province, P.R. China

Correspondence to: Wenzong Xu (\*Tel./Fax:+86-0551-63828157. E-mail:wenzongxu@ahjzu.edu.cn)

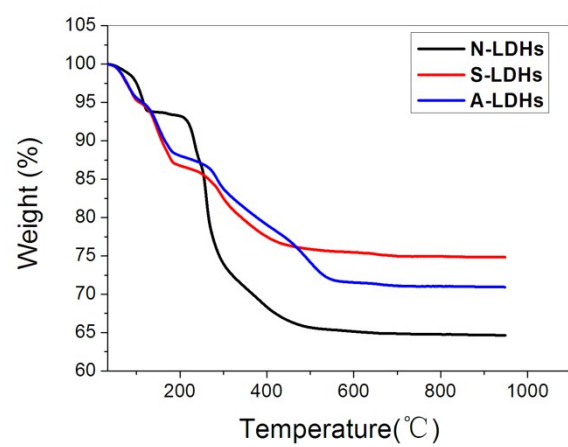

Fig. S1 TG curves of LDHs

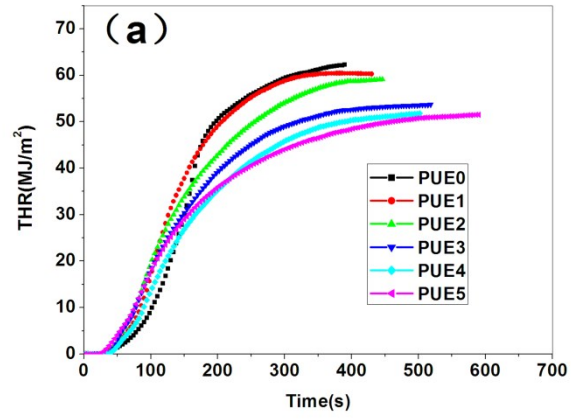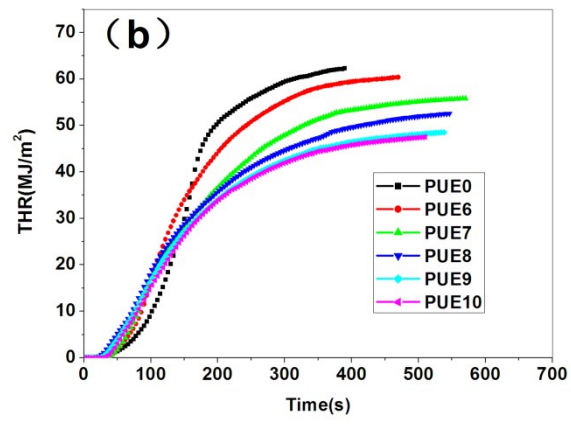

Fig. S2 THR curves of PUE/LDHs composites

Table S1 Characteristic data from TG analysis of PUE/LDHs composites

| Samples | Temperature(°C)             |                              |                              |                               | Char (%) |
|---------|-----------------------------|------------------------------|------------------------------|-------------------------------|----------|
|         | T <sub>5</sub> <sup>a</sup> | T <sub>10</sub> <sup>a</sup> | T <sub>50</sub> <sup>a</sup> | T <sub>max</sub> <sup>b</sup> |          |
| PUE0    | 305                         | 324                          | 435                          | 457                           | <0.1     |
| PUE1    | 295                         | 316                          | 415                          | 420                           | 0.5      |
| PUE3    | 285                         | 302                          | 396                          | 404                           | 2.8      |
| PUE5    | 277                         | 295                          | 382                          | 383                           | 6.6      |
| PUE6    | 299                         | 321                          | 418                          | 425                           | 0.5      |
| PUE8    | 297                         | 319                          | 402                          | 407                           | 2.8      |
| PUE10   | 295                         | 316                          | 393                          | 395                           | 8.2      |

<sup>a</sup> T<sub>5</sub>, T<sub>10</sub>, T<sub>50</sub>, temperature at which 5%,10%,50% weight loss occurs

<sup>b</sup> T<sub>max</sub>, temperature at which maximum weight loss occurs

Table S2 Smoke density of PUE/LDHs composites

| Samples | Ds <sub>max</sub> | Ds <sub>10min</sub> | Samples | Ds <sub>max</sub> | Ds <sub>10min</sub> |
|---------|-------------------|---------------------|---------|-------------------|---------------------|
| PUE0    | 421               | 391                 | —       | —                 | —                   |
| PUE1    | 362               | 347                 | PUE 6   | 306               | 286                 |
| PUE2    | 345               | 311                 | PUE 7   | 224               | 190                 |
| PUE3    | 315               | 274                 | PUE 8   | 204               | 178                 |
| PUE4    | 220               | 196                 | PUE 9   | 182               | 176                 |
| PUE5    | 208               | 192                 | PUE 10  | 180               | 162                 |
